# Supplementary material for: Obtention of biodiesel through an enzymatic two-step process. Study of its performance and characteristic emissions
Source: Royal Society of Chemistry journal article supplement (doi:10.1039/d2ra03578b), 2022-01-01
Supplement: d2ra03578b1.pdf [file d2ra03578b1.pdf]

# Supplementary Information for

## Obtention of biodiesel through an enzymatic two-step process. Study of its performance and characteristic emissions.

Mariana Macías-Alonso, Rosa Hernández-Soto, Marcelino Carrera-Rodríguez, Carmen Salazar-Hernández, Juan Manuel Mendoza-Miranda, José Francisco Villegas-Alcaraz, Joaquín González Marrero.

### This PDF file includes:

- Methods.
  - Typical Procedure for the Preparation of Perchloric Acid Immobilized on Silica Gel ( $\text{HClO}_4\text{-SiO}_2$ ).
  - Purification of WCO.
  - Thin-Layer Chromatography (TLC) Development.
- Tables.
  - Table S1. Key technical data of test engine.
  - Table S2. Technical specifications of the gas analyzer used in the present study.
  - Table S3. Key properties of the test fuels.
- Figures.
  - Figure S1. Yield of WCO into FFAs with different enzymes.
  - Figure S2. Effect of cycle number on biodiesel production for immobilized lipase.
  - Figure S3. Biodiesel IR spectrum.
  - Figure S4. Biodiesel  $^1\text{H}$  NMR spectrum (400 MHz,  $\text{CDCl}_3$ , room temperature).
  - Figure S5. Biodiesel  $^{13}\text{C}$  NMR spectrum (400 MHz,  $\text{CDCl}_3$ , room temperature).
  - Figure S6. Schematic diagram of diesel engine experimental setup.
  - Figure S7. Effect of temperature on the density of diesel, biodiesel, and its blends.
  - Figure S8. Variation of Kinematic Viscosity of diesel, biodiesel, and its blends with Temperature.
  - Figure S9. Variation of brake power vs. engine speed for different biodiesel blends.
  - Figure S10. Variation in brake specific fuel consumption at full load as a function of engine speed.
  - Figure S11. Variation in CO emission depending on engine speed and fuel.
  - Figure S12. Variation in HC emission with engine speed.
  - Figure S13. Variation in  $\text{CO}_2$  emission with engine speed.
  - Figure S14. Variation in  $\text{NO}_x$  emission with engine speed.
  - Scheme S1. Biodiesel production process with enzyme catalyst.
- References

# Supporting Information

## METHODS.

### Typical Procedure for the Preparation of Perchloric Acid Immobilized on Silica Gel (HClO<sub>4</sub>-SiO<sub>2</sub>).<sup>1</sup>

To a suspension of silica gel (23.75g, mesh no. 230-400) in Et<sub>2</sub>O (50 mL) was added HClO<sub>4</sub> (1.25g, 12.5mmol, 1.78mL of a 70% aq solution of HClO<sub>4</sub>) and the mixture was stirred magnetically for 30min at rt. The Et<sub>2</sub>O was removed under reduced pressure (rotary evaporator) and the residue heated at 100°C for 72h under vacuum to afford HClO<sub>4</sub>-SiO<sub>2</sub> (0.5mmol g<sup>-1</sup>) as a free-flowing powder.

### Purification of WCO.

WCO (177.3g) was treated with 7.3g of bentonite under agitation at 75-80°C for 60 min. The mixture was then filtered over Celite, which was washed with n-hexane. After separating the phases, the oil was dried on a stove at 80°C for 48 h. The purified oil (159.6g) was stored at room temperature in a dark glass bottle.

### Thin-Layer Chromatography (TLC) Development.<sup>2</sup>

Sample volumes of 2 μL were applied to the plate, and the TLC was developed with a mixture of heptane: diethyl ether: acetic acid (80:20:1, v/v/v). Compounds were detected either under UV light (at 254 nm) or by spraying a mixture of acetic acid:water: sulfuric acid, 80:16:4.

### Determination of enzymatic hydrolysis efficiency.<sup>3</sup>

## TABLES.

**Table S1.** Key technical data of test engine

| Item                | Specification  |
|---------------------|----------------|
| Motor type          | Hatz 1B20-6    |
| Bore (mm)           | 69             |
| Stroke (mm)         | 62             |
| Rod length (mm)     | 104            |
| Crank length (mm)   | 31             |
| Maximum torque (Nm) | 7              |
| Maximum speed (rpm) | 3500           |
| Output              | approx. 2.0 kW |
| Compression         | 21:1           |
| Oil volume          | 0.9 litre      |

**Table S2.** Technical specifications of the gas analyzer used in the present study

| Measurement     | Range       | Accuracy                                            |
|-----------------|-------------|-----------------------------------------------------|
| O <sub>2</sub>  | 0-25 %      | ±0.1% ±5%                                           |
| CO              | 0-10 %      | ±0.06% ±5%                                          |
| CO <sub>2</sub> | 0-20 %      | ±0.5% ±5%                                           |
| NO <sub>x</sub> | 0-5000 ppm  | ±25ppm ±4%                                          |
| HC              | 0-10000 ppm | < 2000 ppm; ±12 ppm ±5%<br>> 2001 ppm; ±12 ppm ±10% |

**Table S3.** Key properties of the test fuels

| PROPERTY                      | D(100)  | D80B20 | D50B50 | D25B75 | B(100) |
|-------------------------------|---------|--------|--------|--------|--------|
| MOLECULAR FORMULA             | C12-C25 | -      | -      | -      | -      |
| STOICHIOMETRIC AIR/FUEL RATIO | 14.7    | -      | -      | -      | 12.5   |
| LOWER HEATING VALUE (MJ KG-1) | 45.0    | 44.02  | 42.65  | 41.47  | 40.3   |
| DENSITY AT 40°C (G ML-1)      | 0.803   | 0.818  | 0.840  | 0.859  | 0.878  |

|                                                      |      |       |       |       |      |
|------------------------------------------------------|------|-------|-------|-------|------|
| VISCOSITY AT 40°C (MM <sup>2</sup> S <sup>-1</sup> ) | 2.40 | 2.79  | 3.06  | 3.51  | 4.29 |
| CETANE NUMBER                                        | 52   | 52.58 | 53.45 | 54.17 | 54.9 |
| OXYGEN CONTENT (%)                                   | 0    | -     | -     | -     | 11   |

## FIGURES.

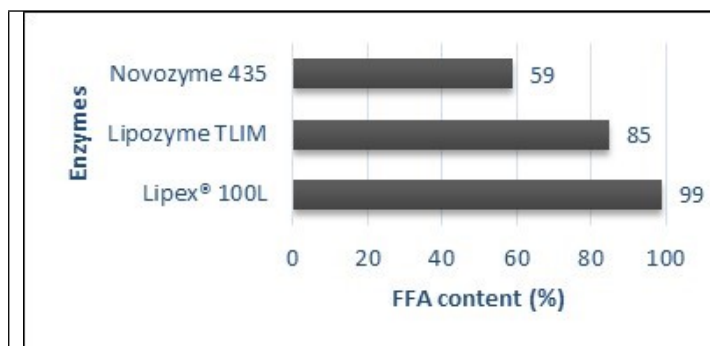

**Figure S1.** Yield of WCO into FFAs with different enzymes. Reaction conditions: 2 g of WCO; 2 mL of 50 mM phosphate buffer pH 7; 2% (w/w) lipase; 36 h, 35°C and 250 rpm

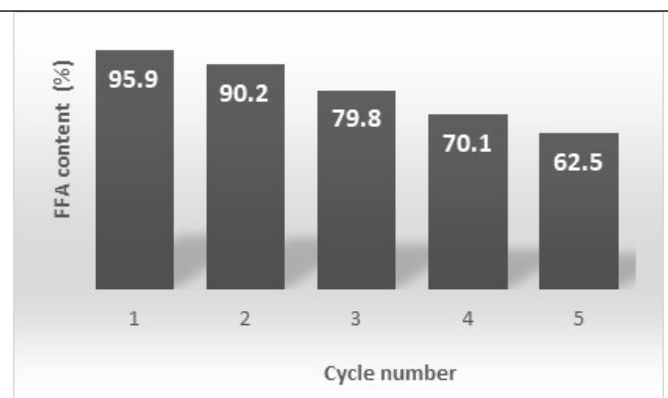

**Figure S2.** Effect of cycle number on biodiesel production for immobilized lipase. Reaction conditions: 2 g of WCO; 2 mL of 50 mM phosphate buffer pH 7; 10% immobilized lipase; 36 h, 35°C and 250 rpm.

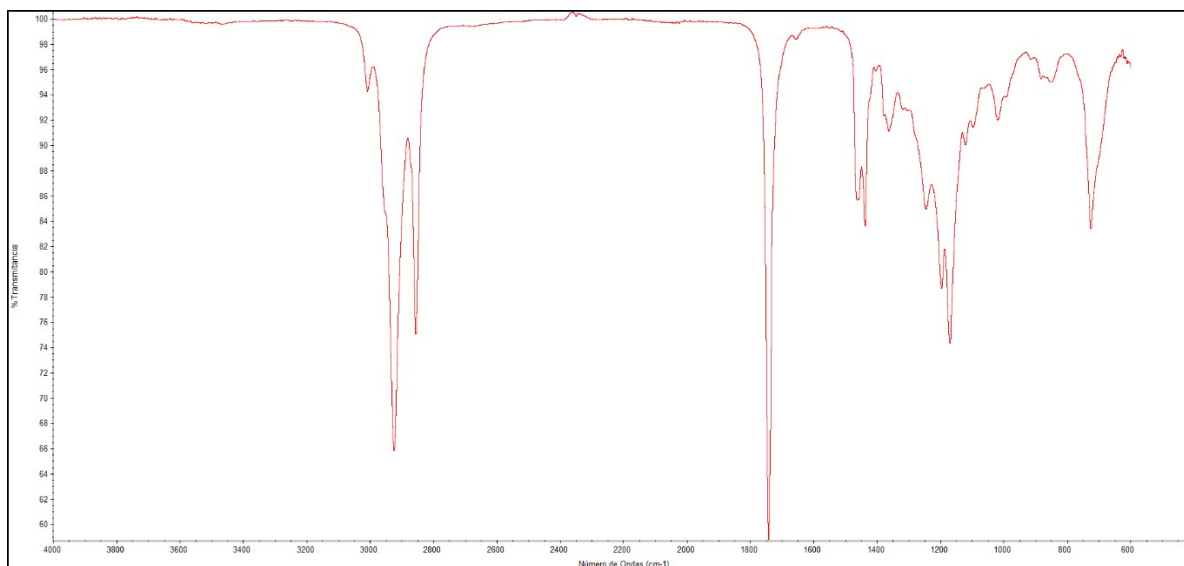

Figure S3. Biodiesel IR spectrum.

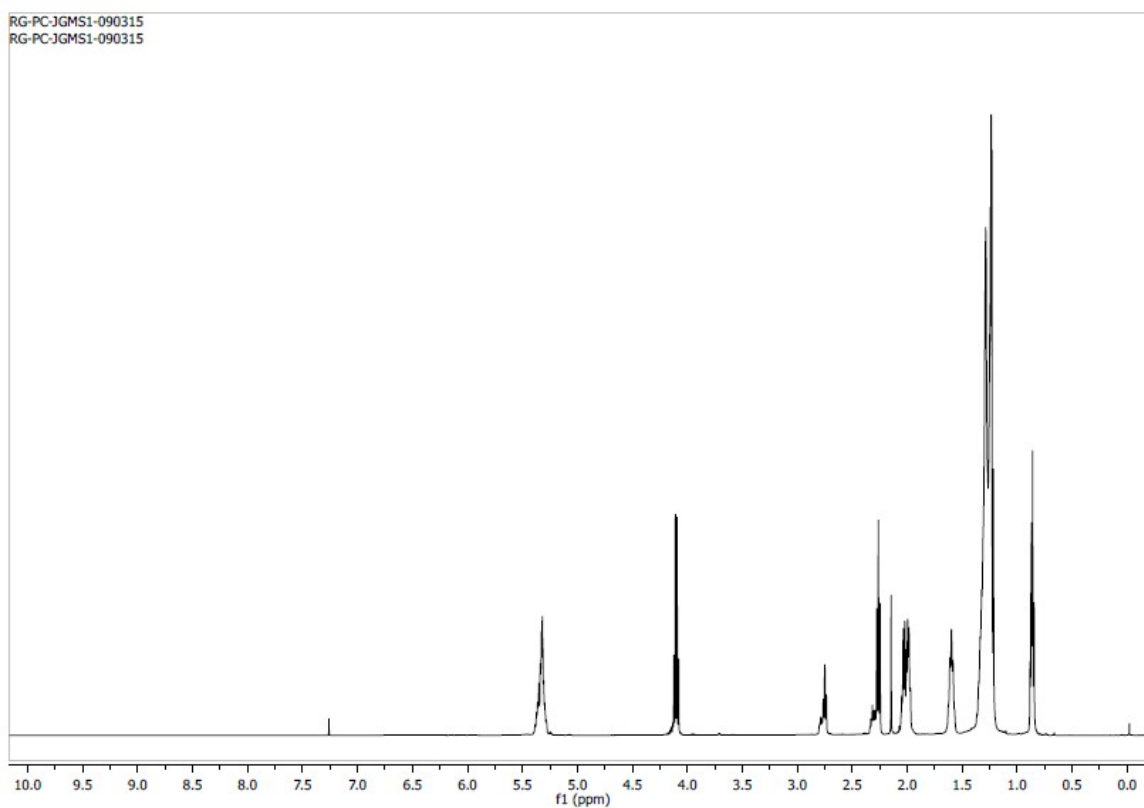

Figure S4. Biodiesel <sup>1</sup>H NMR spectrum (400 MHz, CDCl<sub>3</sub>, room temperature).

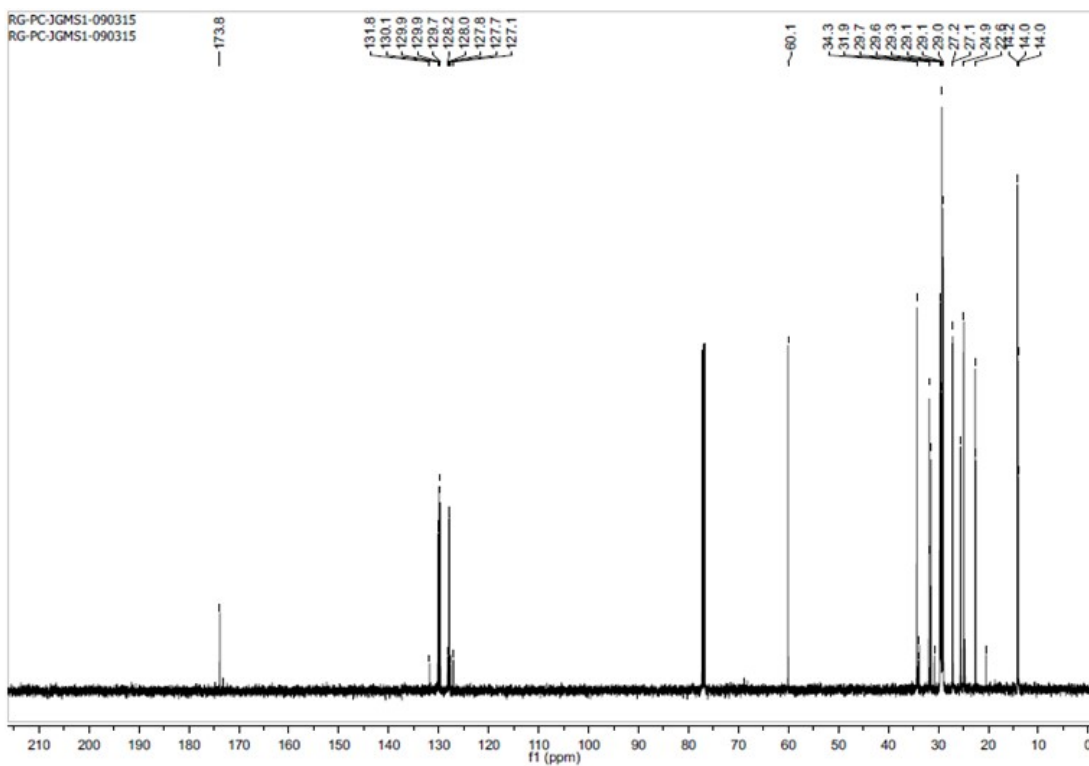

Figure S5. Biodiesel  $^{13}\text{C}$ NMR spectrum (400 MHz,  $\text{CDCl}_3$ , room temperature).

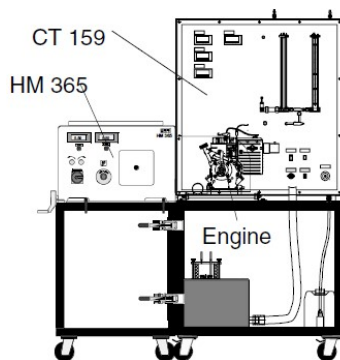

Figure S6. Schematic diagram of diesel engine experimental setup.

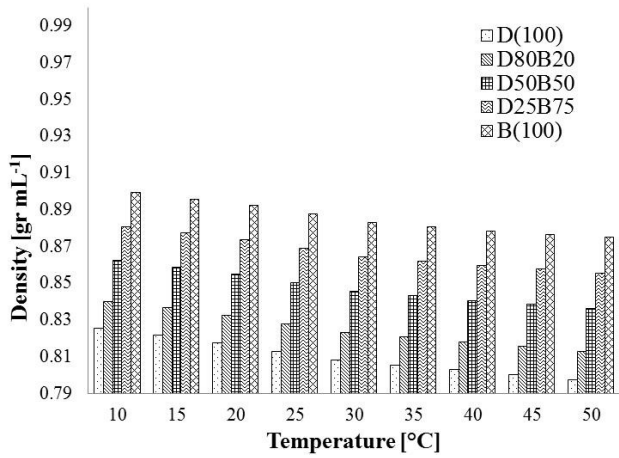

**Figure S7.** Effect of temperature on the density of diesel, biodiesel, and its blends.

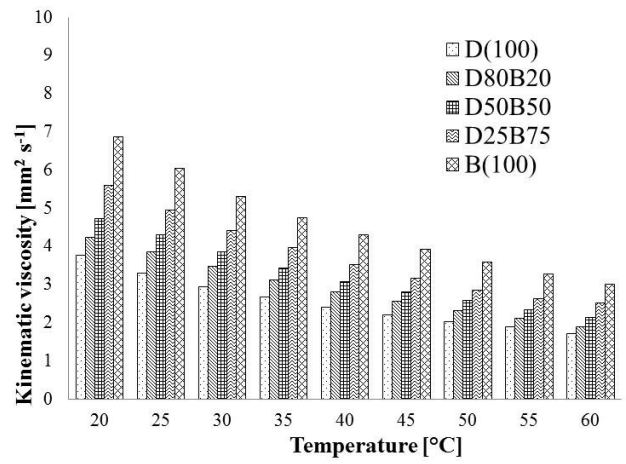

**Figure S8.** Variation of Kinematic Viscosity of diesel, biodiesel, and its blends with Temperature

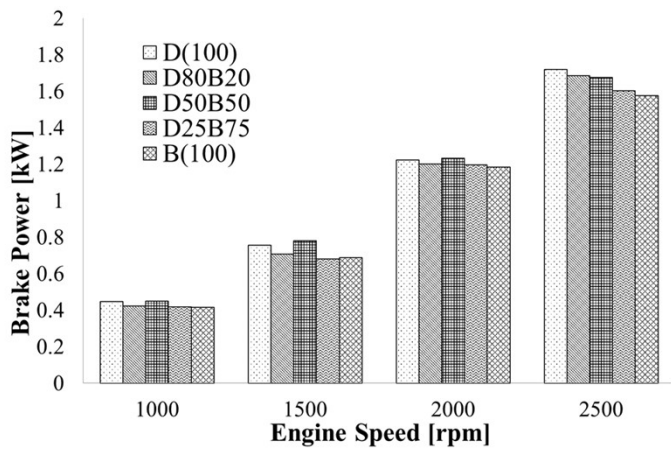

**Figure S9.** Variation of brake power vs. engine speed for different biodiesel blends.

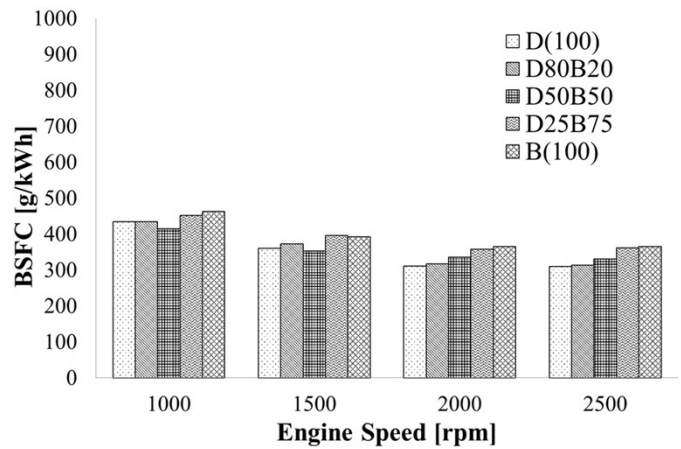

**Figure S10.** Variation in brake specific fuel consumption at full load as a function of engine speed.

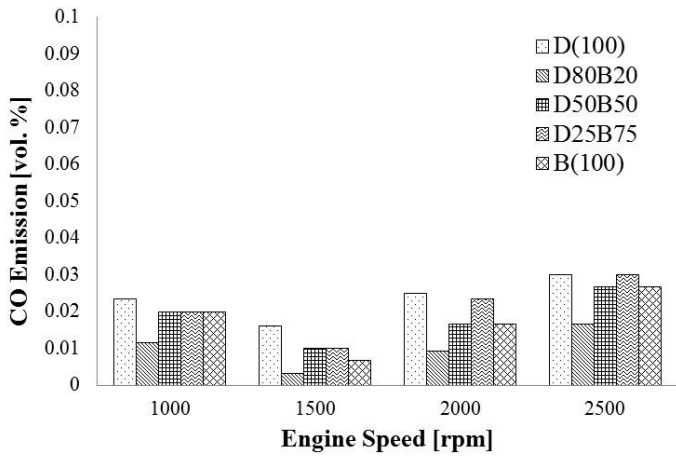

Figure S11. Variation in CO emission depending on engine speed and fuel.

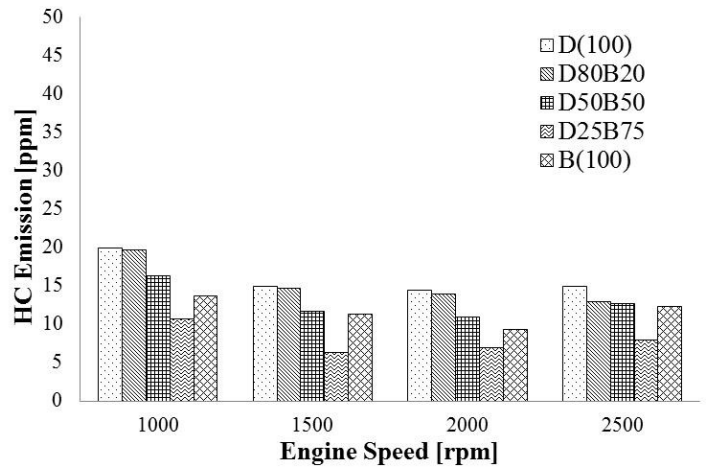

Figure S12. Variation in HC emission with engine speed.

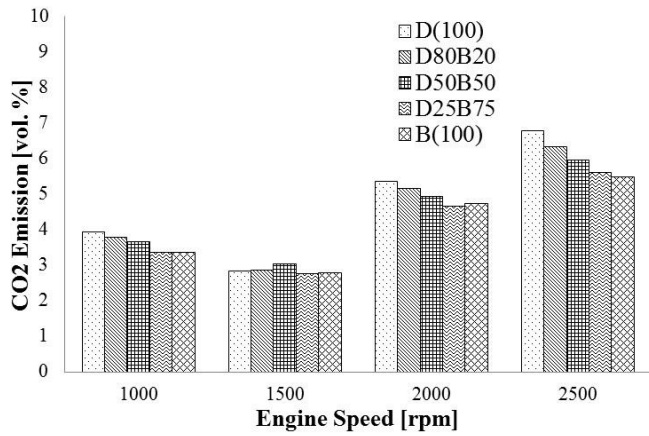

Figure S13. Variation in CO<sub>2</sub> emission with engine speed.

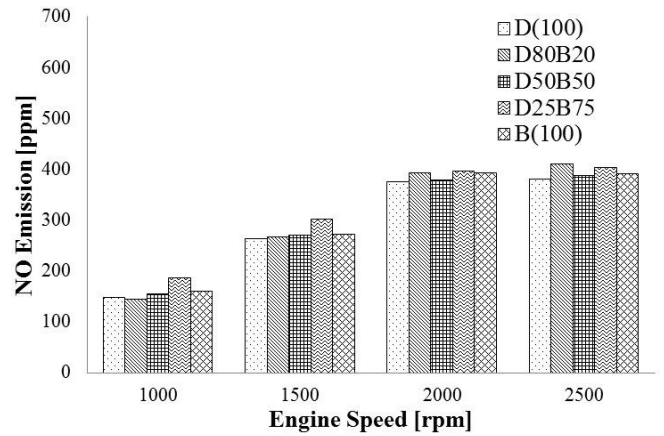

Figure S14. Variation in NO<sub>x</sub> emission with engine speed.

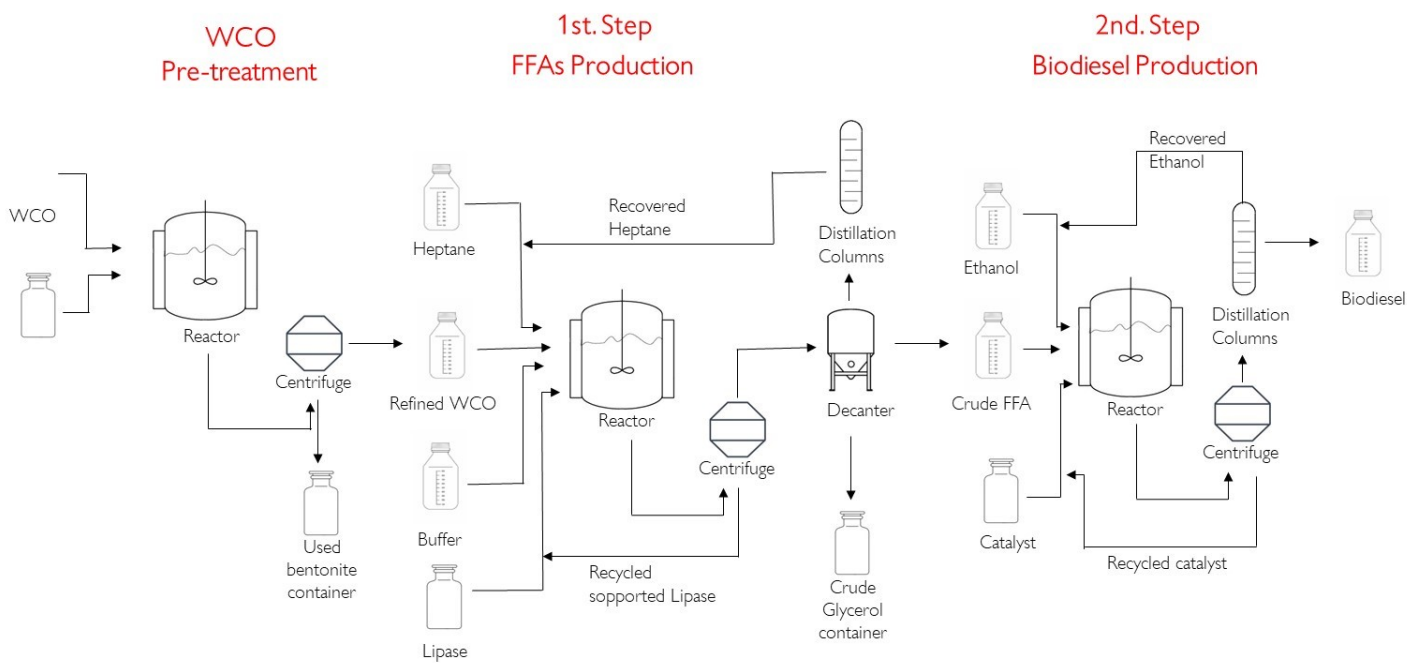

**Scheme S1.** Biodiesel production process with enzyme catalyst.

## References

1. A.K. Chakraborti, R. Gulhane. Perchloric acid adsorbed on silica gel as a new, highly efficient, and versatile catalyst for acetylation of phenols, thiols, alcohols, and amines. *Chem. Commun.*, 2003, **22**, 1896-1897.
2. M. Dołowy, A. Pyka, Chromatographic methods in the separation of long-chain mono- and polyunsaturated fatty acids. *Journal of Chemistry*, 2015, **2015**, Article ID 120830, 20 pages. <https://doi.org/10.1155/2015/120830>.
